# Supplementary material for: Continuous photoproduction of hydrocarbon drop-in fuel by microbial cell factories
Source: PubMed Central journal article supplement (PMC6757031; doi:10.1038/s41598-019-50261-6), 2019-09-23
Supplement: 41598_2019_50261_MOESM1_ESM.pdf [file 41598_2019_50261_MOESM1_ESM.pdf]

## Supplemental information for Moulin et al.

### Continuous photoproduction of hydrocarbon drop-in fuel by microbial cell factories

Solène Moulin<sup>1</sup>, Bertrand Légeret<sup>1</sup>, Stéphanie Blangy<sup>1</sup>, Damien Sorigué<sup>1</sup>, Adrien Burlacot<sup>1</sup>,

Pascaline Auroy<sup>1</sup>, Yonghua Li-Beisson<sup>1</sup>, Gilles Peltier<sup>1</sup>, Fred Beisson<sup>1\*</sup>

<sup>1</sup>Aix Marseille University, CEA, CNRS, BIAM, EBM-Heliobiotec, Saint-Paul-lez-Durance, F-13108 France.

### Supplemental Table 1 : List of strains used for metabolic engineering

| Strain | Relevant genotype                                                                                                                                                                                   |
|--------|-----------------------------------------------------------------------------------------------------------------------------------------------------------------------------------------------------|
| BL21   | <i>E. coli</i> B F <sup>-</sup> ompT hsdS(r <sub>B</sub> <sup>-</sup> m <sub>B</sub> <sup>-</sup> ) dcm <sup>+</sup> Tet <sup>r</sup> gal λ(DE3) endA Hte [ <i>argU ileY leuW Cam<sup>r</sup></i> ] |
| FAP    | pLIC07 : FAP in BL21                                                                                                                                                                                |
| EV     | pBAD/Myc-his B (empty vector) in BL21                                                                                                                                                               |
| Tes    | pBAD/Myc-his B : Tes in BL21                                                                                                                                                                        |

### Supplemental Table 2: List of primers used.

| Primer       | Sequence                                      | Gene                                                |
|--------------|-----------------------------------------------|-----------------------------------------------------|
| pLIC07-FAP-F | TTGGTCTC <b>CCAATG</b> GCCAGCGCAGTTGAAGATATTC | short version FAP<br>( <i>Chlorellavariabilis</i> ) |
| pLIC07-FAP-R | TTGGTCTC <b>CCTAC</b> TCA TGCTGCAACGGTTGCCGG  |                                                     |
| pBAD-Tes-F   | GAGGAATTAACCATGTTAGAATGGAAACCAAAACCAA         | Thioesterase<br>( <i>Umbellularia californica</i> ) |
| pBAD-Tes-R   | GAGTTTTTGTCTAGAACACGTGGTTCAGCTGGAATAACTGA     |                                                     |

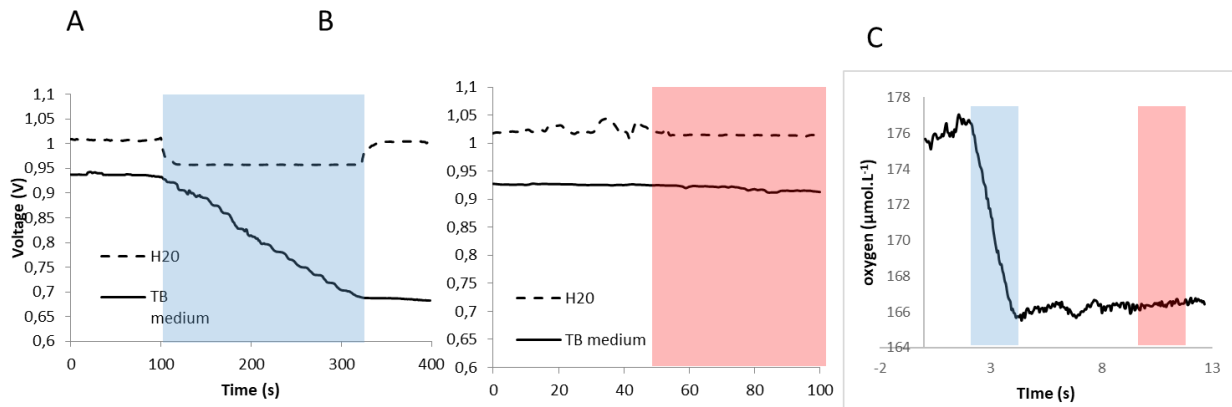

**Supplemental Figure 1** : Light induced O<sub>2</sub> consumption by TB medium. Concentration of O<sub>2</sub> in TB medium was recorded upon illumination by red and blue light. (A,B) O<sub>2</sub> in TB and water upon blue (A) and red (B) light exposure ( $700 \mu\text{mol}_{\text{photon}} \cdot \text{m}^{-2} \cdot \text{s}^{-1}$ ) measured by a Clark-type electrode. (C) O<sub>2</sub> measurement in TB upon blue and red light exposure ( $600 \mu\text{mol}_{\text{photon}} \cdot \text{m}^{-2} \cdot \text{s}^{-1}$ ) measured by a MIMS.

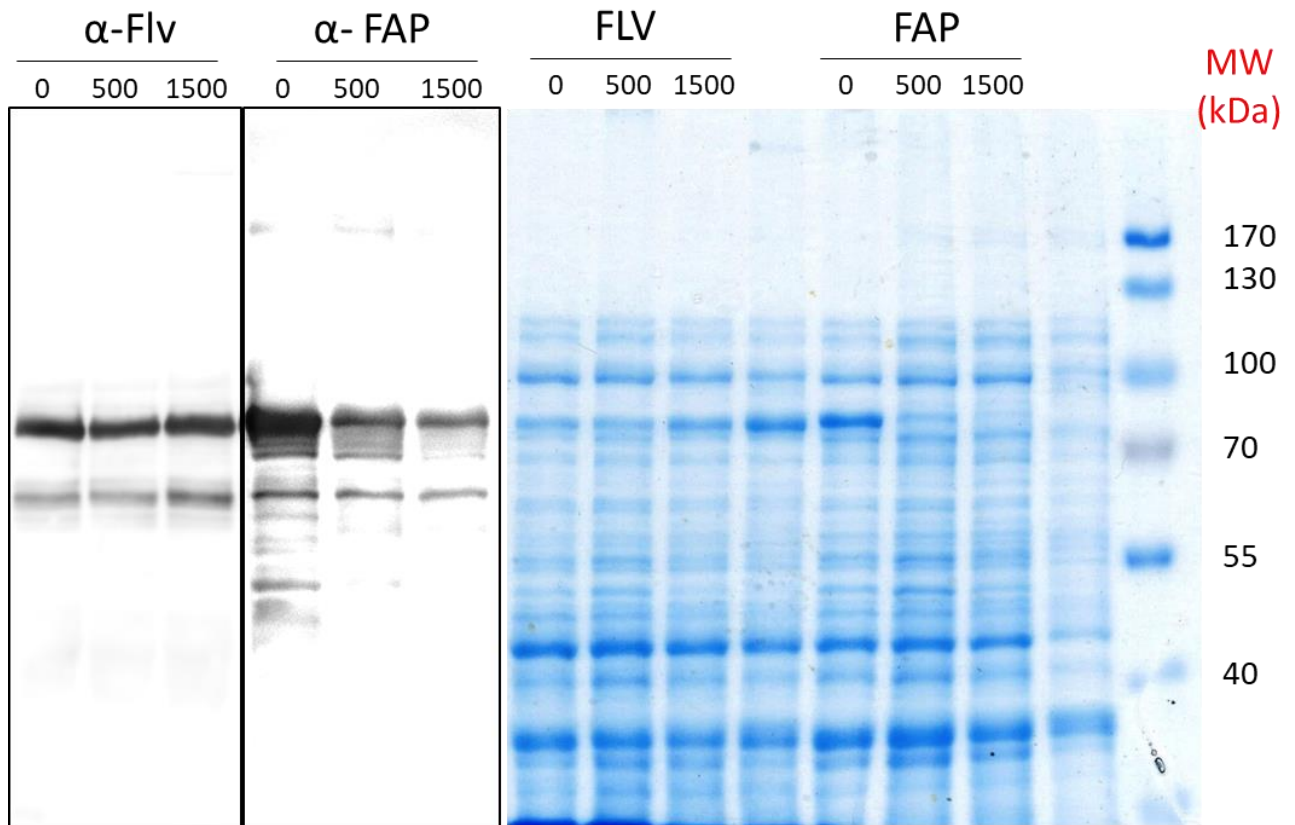

**Supplemental Figure 2**: Uncropped versions of blots and gels of Fig.1

**(A)**

GCCAGCGCAGTTGAAGATATTCGTAAAGTTCTGAGCGATAGCAGCAGTCCGGTTGCAGGTCAGAA  
ATATGATTATATTCTGGTTGGTGGTGGCACCAGCATGTGTTCTGGCAAATCGTCTGAGCGCAGA  
TGGTAGCAAACGTGTTCTGGTTCTGGAAGCAGGTCCGGATAATACCAGCCGTGATGTTAAAATTCC  
GGCAGCAATTACCCGTCTGTTTCGTAGTCCGCTGGATTGGAACCTGTTTAGCGAACTGCAAGAACA  
GCTGGCAGAACGTGAGATTTATATGGCACGTGGTCTGCTGGGTGGTAGCAGCGCAACCAATGC  
AACCCGTGATCATCGTGGTGCAGCCGGTGATTATGATGCATGGGGTGTGAAGGTTGGAGCAGCGA  
AGATGTTCTGAGCTGGTTTGTTCAGGCAGAAACCAATGCAGATTTTGGTCCGGGTGCATATCATGG  
TAGCGGTGGTCCGATGCGTGTGAAAATCCGCGTTATACCAATAAACAGCTGCATACCCGATTTTT  
CAAAGCAGCAGAAGAAGTTGGTCTGACCCCGAATAGCGATTTAATGATTGGAGCCATGATCATGC  
AGGTTATGGCACTTTTAGGTTATGCAGGATAAAGGCACCCGTGCAGATATGTATCGTCAGTATCT  
GAAACCGGTTCTGGGTCGTGTAATCTGCAGGTTCTGACCGGTGCAGCAGTTACCAAAGTTAATAT  
TGATCAGGCAGCAGGTAAGCACAGGCACTGGGTGTTGAATTTCAACCGATGGTCCGACCGGTGA  
ACGTCTGAGTGCAGAACTGGCACCAGGTGGTGAAGTTATTATGTGTGCCGGTGCAGTTCATACCC  
GTTTCTGCTGAAACATAGCGGTGTTGGTCCGAGCGCAGAACTGAAAGAATTTGGTATTCCGGTGT  
TAGCAATCTGGCAGGCGTTGGTGCAGAACTGCAGGATCAGCCTGCATGTCTGACCGCAGCACCGGT  
TAAAGAAAAATATGATGGTATTGCCATCAGCGATCACATTTATAACGAAAAAGGTCAGATTCGCAA  
ACGTGCAATTGCAAGCTATCTGCTGGGAGGTCTGGTGGTCTGACCAGTACCGGTTGTGATCGTGG  
TGCATTTGTTTCGTACCCGAGGTCAGGCATGCCGGATCTGCAGGTACGTTTTGTTCCGGGTATGGCA  
CTGGATCCGGATGGTGTAGCACCTATGTTTCGTTTGCAAAATTTAGAGCCAGGGTCTGAAATGG  
CCGAGCGGTATTACCATGCAGCTGATTGCATGTCTCCGAGAGCACCGGTAGCGTTGGTCTGAAA  
AGCGCAGATCCGTTTGCACCGCCTAAACTGAGTCCGGTTATCTGACCGATAAAGATGGTGCAGAT  
CTGGCAACCCTGCGTAAAGGTATTCATTGGGCACGTGATGTTGCACGTAGCAGCGCACTGAGCGAA  
TATCTGGATGGTGAAGTGTTCGGGTAGCGGTGTTGTTAGTGATGATCAGATTGATGAATATATCC  
GTCGCAGCATTATAGCAGCAATGCAATTACCGGCACCTGTAAAATGGGTAATGCCGGTGATAGCA  
GCAGCGTTGTTGATAATCAGCTGCGTGTTCATGGTGTGGAAGGTCTGCGTGTGTTGATGCAAGCG  
TTGTTCCGAAAATTCGGGTGGTTCAGACAGGTGCACCGGTTGTTATGATTGCAGAACGTGCAGCAG  
CACTGCTGACCGGTAAAGCAACCATTGGTGCAAGCGCAGCAGCACCGGCAACCGTTGCAGCATGA

**(B)**

ATGTTAGAATGGAAACCAAAACCAAAATTACCACAATTATTAGATGATCACTTTGGTTTACACGGT  
TTAGTTTTCCGTCGTACATTTGCTATTCGTTTCATATGAAGTTGGTCCAGATCGTTCAACATCAATTTT  
AGCTGTTATGAATCACATGCAAGAAGCTACATTAACACAGCTAAATCAGTTGGTATTTTAGGTGA  
TGGTTTTGGTACAACATTAGAAATGTCAAACGTGATTTAATGTGGGTTGTTTCGTCGTACACATGTT  
GCTGTTGAACGTTATCCAACATGGGGTGATACAGTTGAAGTTGAATGTTGGATTGGTGCCTCAGGT  
AATAATGGTATGCGTCGTGATTTCTTAGTTCGTGATTGTAAAACAGGTGAAATCTTAACACGTTGTA  
CATCATTATCAGTTTAAATGAATACACGTACACGTCGTTTATCAACAATTCCAGATGAAGTTCGTGG  
TGAAATTGGTCCAGCTTTTATTGATAATGTTGCTGTTAAAGATGATGAAATTAATAAATTACAAAA  
ATTAACGATTCAACAGCTGATTATATTCAAGGTGGTTTAAACACCAGTTGGAATGATTTAGATGTT  
AATCAACACGTTAATAACTTAAAATACGTTGCTTGGGTTTTTGAACAGTTCCAGATTCAATTTTTG  
AATCACACCACATTTTCATCATTTACATTAGAATATCGTTCGTGAATGTACACGTGATTGATTTTACG  
TTCATTAACAACAGTTTTCAGGTGGTTTCATCTGAAGCTGGTTTGTGTTGTTGATCACTTATTACAATTA  
GAAGGTGGTCTGAAGTTTTACGTGCTCGTACAGAATGGCGTCCAAAATTAAGTATTCTTTTCGTG  
GTATTTGAGTTATTCCAGCTGAACCACGTGTT

**Supplemental Figure 3: Nucleotide sequences of synthetic genes used for FAP (A) and Tes (B)**

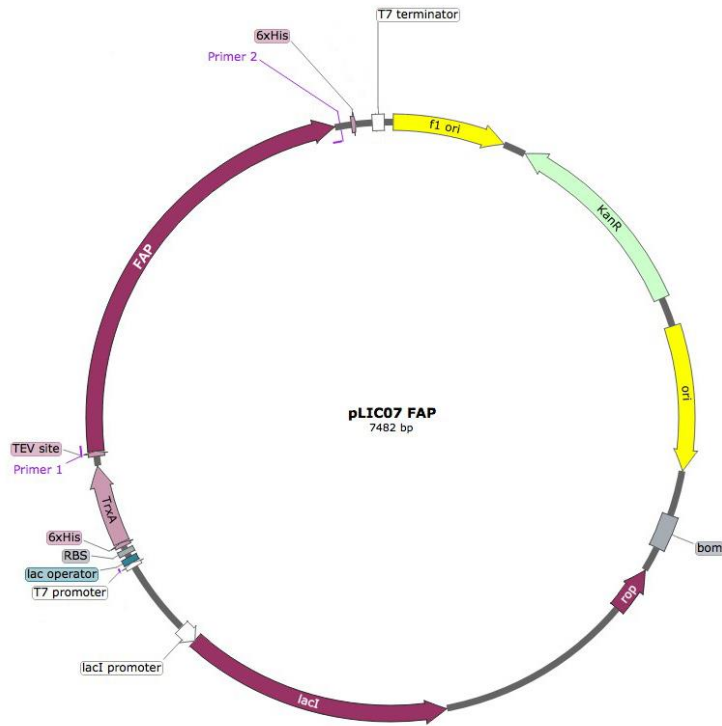

**Supplemental Figure 4: Plasmid map for FAP expression in pLIC07 vector**
